## Genomic imprinting mediates dosage compensation in a young plant XY system

**Authors:** Aline Muyle<sup>1\*†</sup>, Niklaus Zemp<sup>2,6†</sup>, Cécile Fruchard<sup>1</sup>, Radim Cegan<sup>3</sup>, Jan Vrana<sup>4</sup>, Clothilde Deschamps<sup>5</sup>, Raquel Tavares<sup>1</sup>, Roman Hobza<sup>3,4</sup>, Franck Picard<sup>1</sup>, Alex Widmer<sup>6</sup>, Gabriel AB Marais<sup>1</sup>

### Affiliations:

<sup>1</sup>Laboratoire “Biométrie et Biologie Evolutive”, CNRS / Université Lyon 1, France.

<sup>2</sup>Genetic Diversity Center (GDC), ETH Zurich, Switzerland.

<sup>3</sup>Institute of Biophysics, Academy of Sciences of the Czech Republic, Brno.

<sup>4</sup>Center for Biotechnological and Agricultural Research in Hana, Olomouc, Czech Republic

<sup>5</sup>Center for Bioinformatics in Rhône-Alpes (PRABI), Lyon, France

<sup>6</sup>Institute of Integrative Biology, ETH Zurich, Switzerland.

†equal contribution as first authors.

\*Correspondence to: [aline.muyle@univ-lyon1.fr](mailto:aline.muyle@univ-lyon1.fr)

### Abstract:

During the evolution of sex chromosomes, the Y degenerates and its expression gets reduced relative to the X and autosomes. Various dosage compensation mechanisms that recover ancestral expression levels in males have been described in animals. However, the early steps in the evolution of dosage compensation remain unknown, and dosage compensation outside of the animal kingdom is poorly understood. Here, we studied the evolutionarily young XY system of the plant *Silene latifolia*. We show that dosage compensation is achieved in this plant by a genomic imprinting mechanism where the maternal X chromosome is upregulated in both males and females. This is the first time such a situation is observed in any organism. It could be non-optimal for females and may reflect an early stage of dosage compensation evolution, which strikingly resemble the first stage of the path proposed by Ohno for the evolution of X inactivation in mammals.

**One Sentence Summary:** In the plant *Silene latifolia*, reduced expression from the Y chromosome is compensated by upregulation of the maternal X chromosome in both sexes.

## Main Text:

Sex chromosomes have repeatedly evolved from a pair of autosomes in various taxa (1). Y chromosomes initially have similar gene content compared to the X, but ongoing Y degeneration leads to reduced expression of Y-linked genes and to eventual gene loss. This is thought to negatively impact male fitness due to imbalanced doses in protein networks involving both autosomes and sex chromosomes. Dosage compensation allows to counterbalance the negative effects of Y degeneration and takes diverse shapes in various animal species (2–4). Depending on the study, dosage compensation sometimes refers to ancestral expression recovery in XY males, sometimes to expression equality between sexes (hereafter sex equality) and sometimes to both phenomena. Although, *sensu stricto*, dosage compensation should refer to the recovery of balanced expression levels between autosomes and sex chromosomes in both sexes. For clarity, we will use the terms ancestral expression recovery and sex equality whenever appropriate. In *Drosophila*, the X chromosome is upregulated specifically in males, resulting in complete ancestral expression recovery along with sex equality (5). In placentals, on the other hand, one X is inactivated in females, resulting in sex equality without ancestral expression recovery, except for a few dosage-sensitive genes whose expression was doubled (6–10). The situation is similar in *Caenorhabditis elegans*, where both X chromosomes are downregulated in hermaphrodites and only a few genes have their expression doubled for complete dosage compensation (11). In some mammals, the differential expression of alleles depending on the parent of origin, hereafter genomic imprinting (12), serves as a dosage compensation mechanism (6). Indeed, while in most placentals X inactivation is random, in marsupials it is consistently the paternal X chromosome that is inactivated (13). This is also the case in mice placenta (14). However, it is unknown whether genomic imprinting has been involved in the early steps of dosage compensation evolution in mammals. In a seminal work, Ohno hypothesized that X chromosome expression should be doubled first (15), reestablishing ancestral expression levels in XY males. Then, the resulting upregulation in XX females would select for X inactivation or downregulation in a second step. However, in order to understand these early steps of dosage compensation evolution and the order in which they happened, species with young sex chromosomes must be studied.

The plant *Silene latifolia* is an ideal model to study early steps of sex chromosome evolution thanks to its X/Y pair that evolved ~4 Mya (16). However, it appears that dosage compensation is poorly known in plants (17). In *S. latifolia*, only sex equality has been studied so far. Equal expression levels were observed for males and females for some genes in spite of Y expression degeneration (18–23). However, the mechanisms through which sex equality is achieved and whether ancestral expression was recovered in *S. latifolia* males are unknown. In order to address these questions, we have developed a methodology relying on (i) the use of an outgroup without sex chromosomes as an ancestral autosomal reference (17) in order to determine whether X chromosome expression increased or decreased in *S. latifolia*, (ii) the use of specific methods to study allele-specific expression while correcting for reference mapping bias (discussed in 17), and (iii) a statistical framework to quantify dosage compensation (17).

Because only 25% of the large and highly repetitive *S. latifolia* genome has been sequenced so far (23), we used an RNA-seq approach based on the sequencing of a cross (parents and a few offspring of each sex), to infer sex-linked contigs (i.e. contigs located on the non-recombining region of the sex chromosome pair) (24). X/Y contigs and X-hemizygous contigs (X-linked contigs without Y allele expression) were inferred separately for three tissues: flower buds, seedlings and leaves (Supplementary Table S2). About half of the inferred sex-

linked contigs could be validated by independent data (Supplementary Table S2 and Materials and Methods). Contigs with significant expression difference between males and females were removed for further analysis (Supplementary Table S2 and Materials and Methods) as they are likely to be involved in sex-specific functions and therefore are not expected to be dosage compensated (25). X-hemizygous contigs have previously been characterized as having partial sex equality (23) and are analyzed separately due to limitations of the RNA-seq approach. Our results suggest that X-hemizygous genes are less dosage sensitive than X/Y genes, which could explain their poor level of dosage compensation (Supplementary Text S1).

Paternal and maternal allele expression levels in males and females were estimated for sex-linked and autosomal contigs in *S. latifolia* after correcting for reference mapping bias (Materials and Methods). Then, the corresponding allelic expression levels in one or two closely related outgroups without sex chromosomes were used as a reference to polarise expression changes in *S. latifolia*. For autosomal contigs, expression levels did not differ between *S. latifolia* and the outgroups (Figure 1). This is due to the close relatedness of *S. latifolia* and the outgroups (~5My, Supplementary Figure S1), and validates the use of the outgroups as a reference for ancestral expression levels. We used the ratio of Y over X expression levels in males as a proxy for Y degeneration in order to categorize X/Y contigs. As the Y allele degenerates (paternal allele in blue in Figure 1), the expression of the X allele in males increases (maternal allele in red in Figure 1). This is the first direct evidence for ancestral expression recovery in *S. latifolia*, i.e. ancestral expression levels are reestablished in males in spite of Y expression degeneration. In females, the maternal X allele expression increases with Y degeneration (gray bars in Figure 1), in a way similar to the maternal X allele in males. The paternal X allele in females, however, maintained its ancestral expression level regardless of Y degeneration (black bars in Figure 1). Overall, sex equality is not achieved in *S. latifolia* due to upregulation of sex-linked genes in females compared to ancestral expression levels. All results were confirmed on two other tissues, as well as when analysing independently validated contigs only (although statistical power is sometimes lacking due to the low number of validated contigs, Supplementary Figures S2-S7).

The maternal X allele is upregulated both in males and females (Figure 1 and Supplementary Figures S2-S7), suggesting genomic imprinting is playing a role in dosage compensation in *S. latifolia*. In order to statistically test this observation, we used a linear regression model with mixed effects (Materials and Methods). The outgroups were used as a reference and expression levels in *S. latifolia* were then analyzed while accounting for the variability due to contigs and individuals. The joint effect of the parental origin and the degeneration level was estimated, which allowed to compute the difference in expression between the maternal and paternal alleles in females for different degeneration categories (Figure 2). In autosomal contigs, the maternal and paternal alleles are expressed in a similar way in females, showing a global absence of genomic imprinting for these contigs. However, for X/Y contigs, the difference between the maternal and paternal X in females increases with Y degeneration. Results were confirmed on two other tissues as well as when analysing independently validated contigs only (Supplementary Figures S8-S13).

Previous studies that showed sex equality between sexes in *S. latifolia* could have been explained by simple buffering mechanisms, where one copy of a gene is expressed at a higher level when haploid than when diploid, due to higher availability of the cell machinery or adjustments in gene expression networks (23, 26, 27). However, the upregulation of the X chromosome we observe here in *S. latifolia* males cannot be explained by buffering mechanisms

alone, otherwise the maternal X in females would not be upregulated. Rather, our findings suggest a specific dosage compensation mechanism relying on genomic imprinting has evolved in *S. latifolia*. This mechanism looks like an evolutionary convergence with marsupials, although the mechanistic details are very different between the two species (in marsupials the paternal X is inactivated, while in *S. latifolia* the maternal X is upregulated).

An exciting challenge ahead will be to understand how upregulation of the maternal X is achieved in *S. latifolia* males and females at the molecular level. Chromosome staining suggests that DNA methylation could be involved. Indeed, one arm of one of the two X chromosomes in females was shown to be hypomethylated, as well as the same arm of the single X in males (28) (Supplementary Figure S14). Based on our results, we hypothesize that the hypomethylated X chromosome corresponds to the maternal, upregulated X. Unfortunately, parental origin of the X chromosomes was unknown in this study (28). It would be insightful in the future to study DNA methylation patterns in *S. latifolia* paternal and maternal X chromosomes, along with a homologous autosomal pair in a closely related species without sex chromosomes. The methylation pattern observed by chromosome staining suggests that dosage compensation in *S. latifolia* could be a chromosome arm-wide phenomenon. However, the position of genes along the X chromosome is required to fully confirm this hypothesis with expression data.

Female upregulation of the X chromosome compared to autosomes was previously reported in *Tribolium castaneum*, but later shown to be due to biases from inclusion of gonads in whole body extracts (4). Our findings thus provide the first characterization of such a situation, which could be deleterious for females. This suggests that reduced expression of sex-linked genes in males is more deleterious than upregulation in females. The young age of *S. latifolia* sex chromosomes may explain this potentially suboptimal pattern, and sex equality might evolve only at a later stage, following the evolutionary path proposed by Ohno for placentals (15).

## References and Notes

1. D. Bachtrog, Y-chromosome evolution: emerging insights into processes of Y-chromosome degeneration. *Nat. Rev. Genet.* **14**, 113–124 (2013).
2. B. Charlesworth, The evolution of chromosomal sex determination and dosage compensation. *Curr. Biol. CB.* **6**, 149–162 (1996).
3. J. E. Mank, Sex chromosome dosage compensation: definitely not for everyone. *Trends Genet. TIG.* **29**, 677–683 (2013).
4. L. Gu, J. Walters, Sex chromosome dosage compensation evolution in animals: a beautiful theory, undermined by facts and bedeviled by details. *Genome Biol. Evol.* (2017).
5. M. I. Kuroda, A. Hilfiker, J. C. Lucchesi, Dosage Compensation in Drosophila—a Model for the Coordinate Regulation of Transcription. *Genetics.* **204**, 435–450 (2016).
6. E. Pessia, J. Engelstädter, G. A. B. Marais, The evolution of X chromosome inactivation in mammals: the demise of Ohno’s hypothesis? *Cell. Mol. Life Sci. CMLS.* **71**, 1383–1394 (2014).
7. C. M. Disteche, Dosage compensation of the sex chromosomes. *Annu. Rev. Genet.* **46**, 537–560 (2012).

8. P. Julien *et al.*, Mechanisms and evolutionary patterns of mammalian and avian dosage compensation. *PLoS Biol.* **10**, e1001328 (2012).
9. E. Pessia, T. Makino, M. Bailly-Bechet, A. McLysaght, G. A. B. Marais, Mammalian X chromosome inactivation evolved as a dosage-compensation mechanism for dosage-sensitive genes on the X chromosome. *Proc. Natl. Acad. Sci. U. S. A.* **109**, 5346–5351 (2012).
10. S. Ercan, Mechanisms of x chromosome dosage compensation. *J. Genomics.* **3**, 1–19 (2015).
11. S. E. Albritton *et al.*, Sex-biased gene expression and evolution of the x chromosome in nematodes. *Genetics.* **197**, 865–883 (2014).
12. M. M. Patten *et al.*, The evolution of genomic imprinting: theories, predictions and empirical tests. *Heredity.* **113**, 119–128 (2014).
13. D. J. Whitworth, A. J. Pask, The X factor: X chromosome dosage compensation in the evolutionarily divergent monotremes and marsupials. *Semin. Cell Dev. Biol.* **56**, 117–121 (2016).
14. A. Wagschal, R. Feil, Genomic imprinting in the placenta. *Cytogenet. Genome Res.* **113**, 90–98 (2006).
15. S. Ohno, Sex chromosomes and sex-linked genes. *Springer-Verl. Berl. Heidelb. N. Y.* (1967).
16. A. Rautenberg, L. Hathaway, B. Oxelman, H. C. Prentice, Geographic and phylogenetic patterns in *Silene* section *Melandrium* (Caryophyllaceae) as inferred from chloroplast and nuclear DNA sequences. *Mol. Phylogenet. Evol.* **57**, 978–991 (2010).
17. A. Muyle, R. Shearn, G. A. Marais, The Evolution of Sex Chromosomes and Dosage Compensation in Plants. *Genome Biol. Evol.* **9**, 627–645 (2017).
18. M. V. Chibalina, D. A. Filatov, Plant Y chromosome degeneration is retarded by haploid purifying selection. *Curr. Biol. CB.* **21**, 1475–1479 (2011).
19. R. Bergero, D. Charlesworth, Preservation of the Y transcriptome in a 10-million-year-old plant sex chromosome system. *Curr. Biol. CB.* **21**, 1470–1474 (2011).
20. A. Muyle *et al.*, Rapid de novo evolution of X chromosome dosage compensation in *Silene latifolia*, a plant with young sex chromosomes. *PLoS Biol.* **10**, e1001308 (2012).
21. Y. Kazama *et al.*, SIWUS1; an X-linked gene having no homologous Y-linked copy in *Silene latifolia*. *G3 Bethesda Md.* **2**, 1269–1278 (2012).
22. R. Bergero, S. Qiu, D. Charlesworth, Gene Loss from a Plant Sex Chromosome System. *Curr. Biol. CB* (2015), doi:10.1016/j.cub.2015.03.015.

23. A. S. T. Papadopulos, M. Chester, K. Ridout, D. A. Filatov, Rapid Y degeneration and dosage compensation in plant sex chromosomes. *Proc. Natl. Acad. Sci. U. S. A.* **112**, 13021–13026 (2015).
24. A. Muyle *et al.*, SEX-DETECTOR: A Probabilistic Approach to Study Sex Chromosomes in Non-Model Organisms. *Genome Biol. Evol.* **8**, 2530–2543 (2016).
25. H. Ellegren, J. Parsch, The evolution of sex-biased genes and sex-biased gene expression. *Nat. Rev. Genet.* **8**, 689–698 (2007).
26. J. H. Malone *et al.*, Mediation of *Drosophila* autosomal dosage effects and compensation by network interactions. *Genome Biol.* **13**, r28 (2012).
27. R. A. Veitia, F. Veyrunes, S. Bottani, J. A. Birchler, X chromosome inactivation and active X upregulation in therian mammals: facts, questions, and hypotheses. *J. Mol. Cell Biol.* **7**, 2–11 (2015).
28. J. Siroky, M. R. Castiglione, B. Vyskot, DNA methylation patterns of *Melandrium album* chromosomes. *Chromosome Res. Int. J. Mol. Supramol. Evol. Asp. Chromosome Biol.* **6**, 441–446 (1998).

## Figures

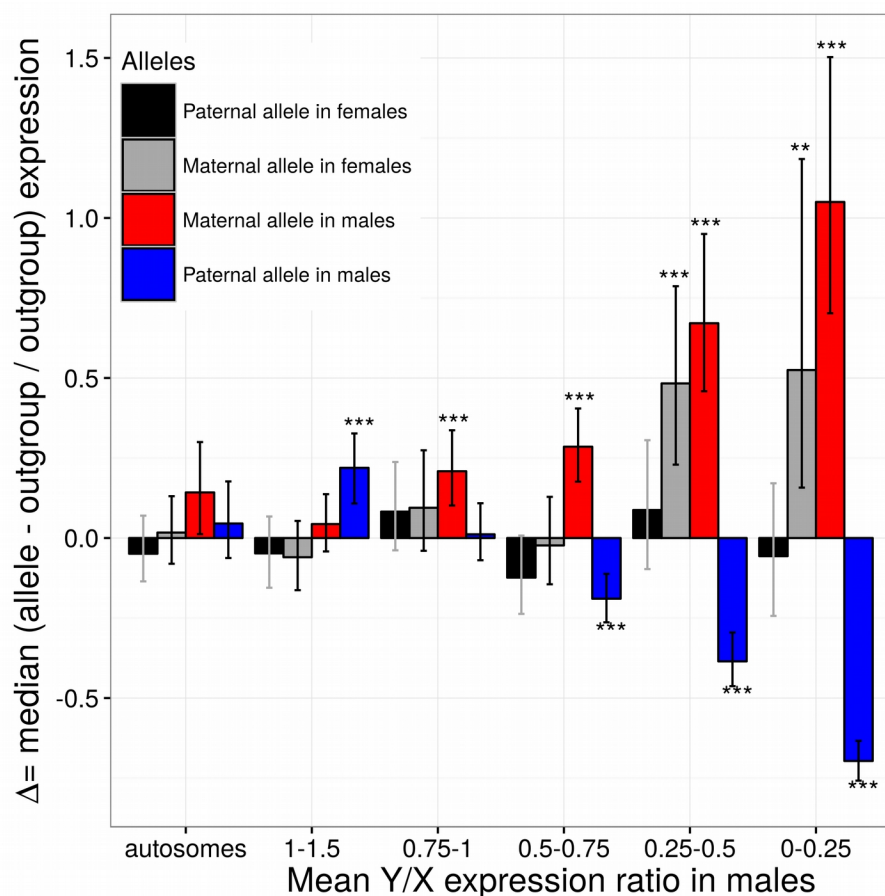

**Fig. 1:** Normalised difference (hereafter  $\Delta$ ) in allelic expression levels between *S. latifolia* and the outgroup without sex chromosomes *S. vulgaris*, in autosomal and sex-linked contigs for the seedling tissue. If  $\Delta$  is lower, higher or equal to zero, then expression in *S. latifolia* is respectively lower, higher or equal to the outgroup (See Materials and Methods for details). For all contig categories,  $\Delta$  was compared to zero using a Wilcoxon test. The median  $\Delta$ , confidence intervals and p-values adjusted for multiple testing using a Benjamini and Hochberg correction are shown (\*\*\*: p-value < 0.001; \*\*: p-value < 0.01, \*: p-value < 0.05). The Y/X ratio was used as a proxy for Y degeneration. Contigs with sex-biased expression were removed, as well as contigs with Y/X expression ratios above 1.5. Sample sizes for the different contig categories are: autosomal:200; 1-1.5:148; 0.75-1:139; 0.5-0.75:160; 0.25-0.5:114; 0-0.25:79 (we randomly selected 200 autosomal contigs to ensure similar statistical power among gene categories).

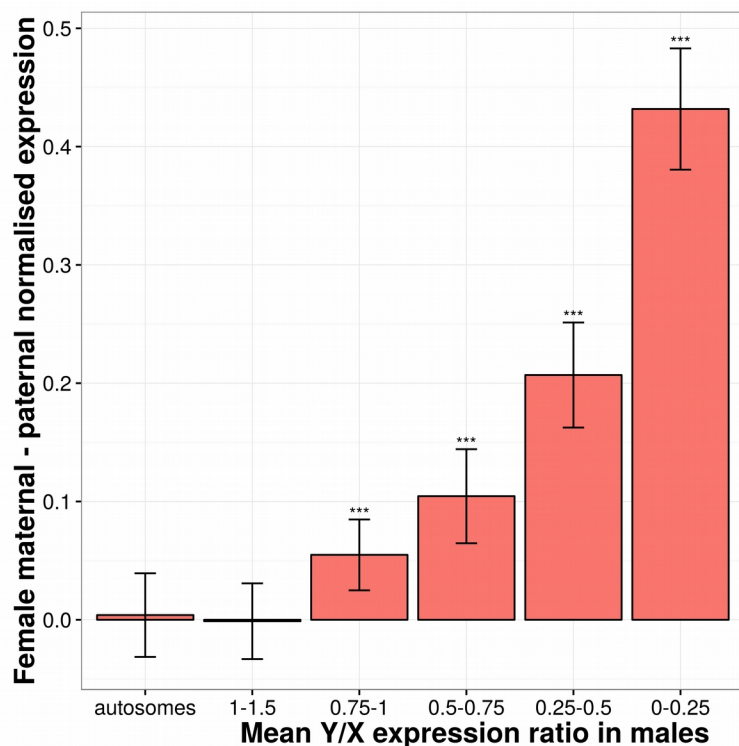

**Fig. 2:** Normalised expression difference between the maternal and paternal allele in *S. latifolia* females in autosomal and sex-linked contigs for the seedling tissue. The Y axis unit is the normalised allelic read count difference in log scale. A linear regression model with mixed effects was used to estimate the normalised difference between the effect of paternal and maternal origin of alleles in interaction with the contig status (autosomal or sex-linked with various levels of Y degeneration), while accounting for inter-contig and inter-individual variability (see Materials and Methods for details). See Fig. 1 legend for sample sizes for the different contig categories and statistical significance symbols.

## Supplementary Materials:

Supplementary Text S1

Materials and Methods

Supplementary Figures S1-S12

Supplementary Tables S1-S3

## Acknowledgments

This project was supported through an ANR grant ANR-14-CE19-0021-01 to G.A.B.M and SNSF grants 141260 and 160123 to A.W.



## Supplementary Materials

### Supplementary Text 1: Dosage compensation in X-hemizygous genes

X-hemizygous contigs are inferred by SEX-DETECTOR from X polymorphisms that segregate in the absence of Y allele expression in the RNA-seq data. For that reason, X-hemizygous contigs are harder to detect compared to X/Y contigs due to lower polymorphism (X/Y contigs can be detected both with X and X/Y polymorphisms). Another inherent bias to X-hemizygous contig inference comes from the assembly step. If the X and the Y copy are too divergent to be assembled together, the X contig will be wrongly inferred as X-hemizygous by SEX-DETECTOR because Y alleles will be absent from the contig. This bias was at least partly corrected in the analyses presented here (see Material and Method section 5.1). Also, previous work showed that only some X-hemizygous genes are dosage compensated in *Silene latifolia* (1–5). For all the above reasons, results on X-hemizygous contigs are analysed separately here. Poor dosage compensation of X-hemizygous contigs compared to X/Y contigs with high Y degeneration was observed across all tissues (Supplementary Figures 2 to 7). Also, the parental origin of the X chromosome has limited to no effect on female X expression levels for X-hemizygous contigs, unlike X/Y contigs (Supplementary Figures 8 to 13). A reason that could explain such a different pattern for X-hemizygous genes compared to X/Y genes is the possible dosage insensitivity of X-hemizygous genes. X-hemizygous genes could have lost their Y copy because dosage was not important for them and selection neither slowed down the loss of the Y copy nor selected for dosage compensation when degeneration inevitably occurred (5). A well described characteristic of dosage sensitive genes is that they tend to code proteins involved in large complexes (6). Using the GO-term analysis, X-hemizygous contigs were found to be significantly depleted in ribosomal protein coding genes compared to autosomal genes (p-value  $1.3 \cdot 10^{-4}$ ), which is consistent with the global dosage insensitivity of X-hemizygous genes in *S. latifolia*. This depletion in large protein complexes was not found when comparing X/Y genes to autosomal genes.

### Materials and Methods:

#### **1) Plant material and sequencing**

##### **1.1) RNA-seq Illumina data**

RNA-seq data from previous studies were used (the GEO database GEO Series GSE35563, European Nucleotide Archive PRJEB14171), it included flower buds and leaf tissues from individuals of a cross in *S. latifolia* as well as individuals in *S. vulgaris*. In addition to these preexisting data, RNA-seq reads were generated in a comparable way for seedlings of a controlled cross using the same parents in *S. latifolia*, four males and four females were sampled (Seed\_lati\_female\_1, Seed\_lati\_female\_2, Seed\_lati\_female\_3, Seed\_lati\_female\_4, Seed\_lati\_male\_1, Seed\_lati\_male\_2, Seed\_lati\_male\_3 and Seed\_lati\_male\_4). Seedlings were

also sequenced for *S. vulgaris* (Seed\_vulg\_herm\_1, Seed\_vulg\_herm\_2, Seed\_vulg\_herm\_3 and Seed\_vulg\_herm\_4). Seedlings were grown in a temperature controlled climate chamber in Eschikon (Switzerland) using the same conditions as in (7). The *S. latifolia* and *S. vulgaris* seedlings were collected without roots at the four-leaf stage. The sexing of the *S. latifolia* seedlings was done using Y specific markers (8) that were amplified with the direct PCAR KAPA3G Plant PCR Kit (however male number 3 was later shown to be a female). High quality RNA (RIN > 8.5) was extracted using the total RNA mini kit from Geneaid. Twelve RNA-seq libraries were produced using the Truseq kit v2 from Illumina. Libraries were tagged individually and sequenced in two Illumina HiSeq 2000 channels at the D-BSSE (ETH Zürich, Switzerland) using 100 bp paired-end read protocol.

*S. viscosa* seeds we received from botanical gardens or collected in the wild by Bohuslav Janousek and grown under controlled conditions in a greenhouse in Eschikon (Switzerland) and Lyon (France). Similarly to (7), flower buds after removing the calyx and leaves were collected. Total RNA were extracted through the Spectrum Plant Total RNA kit (Sigma, Inc., USA) following the manufacturer's protocol and treated with a DNase. Libraries were prepared with the TruSeq RNA sample Preparation v2 kit (Illumina Inc., USA). Each 2 nM cDNA library was sequenced using a paired-end protocol on a HiSeq2000 sequencer. Demultiplexing was performed using CASAVA 1.8.1 (Illumina) to produce paired sequence files containing reads for each sample in Illumina FASTQ format. RNA extraction and sequencing were done by the sequencing platform in the AGAP laboratory, Montpellier, France (<http://umr-agap.cirad.fr/>).

A female individual from an interspecific *S. latifolia* cross (C1\_37) was back crossed with a male from an 11 generation inbred line (U10\_49). The offspring (hereafter called BC1 individuals) were grown under controlled conditions in a greenhouse in Eschikon (Switzerland). High quality RNA from flower buds as described in (9) was extracted from 48 BC1 individuals (35 females and 13 males). 48 RNA-seq libraries were produced using the Truseq kit v2 from Illumina with a median insert size of about 200 bp. Individuals were tagged separately and sequenced in four Illumina HiSeq 2000 channels at the D-BSSE (ETH Zürich, Switzerland) using 100bp paired-end read protocol. The parents used for this back cross had previously been sequenced in a similar way (7, 10).

### **1.2) DNA-seq data from filtered Y chromosome**

Y chromosome DNA was isolated using flow cytometry. The samples for flow cytometric experiments were prepared from root tips according to (11) with modifications. Seeds of *S. latifolia* were germinated in a petri dish immersed in water at 25°C for 2 days until optimal length of roots was achieved (1 cm). The root cells were synchronized by treatment with 2mM hydroxyurea at 25°C for 18h. Accumulation of metaphases was achieved using 2.5µM oryzalin. Approximately 200 root tips were necessary to prepare 1ml of sample. The chromosomes were released from the root tips by mechanical homogenization using a Polytron PT1200 homogenizer (Kinematica AG, Littau, Switzerland) at 18,000rpm for 13 s. The crude suspension was filtered and stained with DAPI (2µg/ml). All flow cytometric experiments were performed on FACS Aria II SORP flow cytometer (BD Biosciences, San José, Calif., USA). Isolated Y chromosomes were sequenced with 2x100bp PE Illumina HiSeq.

### **1.3) RNA-seq PacBio data**

Plants from an 11 generation inbred line were grown under controlled conditions in a greenhouse in Eschikon (Switzerland). One male (U11\_02) was randomly selected. High quality RNA (RIN > 7.5) were extracted using the total RNA mini kit of Geneaid from very small flower

buds, small and large flower buds, flowers before anthesis without calyces, rosette leaves, seedlings (4 leaves stage) and pollen. RNA of the different tissues was equally pooled and cDNA was produced using the Clontech SMARTer Kit. The cDNA pool was then normalized using a duplex specific endonuclease of the Evrogen TRIMMER kit. Two ranges were selected (1- 1.3 kb and 1.2 -2 kb) using the Pippin Prep (Sage Science). Two SMRTbell libraries were prepared using the C2 Pacific Biosciences (PacBio) chemistry and sequenced with two SMRT Cells runs on a PacBio RS II at the Functional Genomic Center Zurich (FGCZ).

#### **1.4) RNA-seq 454 data**

Previously generated 454 data was used (7, 12).

#### **2) Reference transcriptome assembly**

The same reference transcriptome as in Muyle et al. (12) and Zemp et al. (7) was used.

#### **3) Inference of sex-linked contigs**

Autosomal and sex-linked contigs were inferred as in Muyle et al. (12) and Zemp et al. (7). Illumina reads from the individuals of the cross were mapped onto the assembly using BWA (13) version 0.6.2 with the following parameters: `bwa aln -n 5` and `bwa sampe`. The libraries were then merged using SAMTOOLS version 0.1.18 (14). The obtained alignments were locally realigned using GATK IndelRealigner (15) and were analysed using reads2snps (16) version 3.0 with the following parameters: `-fis 0 -model M2 -output_genotype best -multi_alleles acc -min_coverage 3 -par false`. This allowed to genotype individuals at each loci while allowing for biases in allele expression, and without cleaning for paralogous SNPs. Indeed, X/Y SNPs tend to be filtered out by paraclean, a program which removes paralogous positions (17). A second run of genotyping was done with paraclean in order to later remove paralogous SNPs from autosomal contigs only. SEX-DETECTOR (12) was then used to infer contig segregation types after estimation of parameters using an SEM algorithm. Contig posterior segregation type probabilities were filtered to be higher than 0.8. Because the parents were not sequenced for the leaf and seedling datasets, SEX-DETECTOR was run using the flower bud data for the parents.

#### **4) Reference mapping bias correction**

In order to avoid biases towards the reference allele in expression level estimates, a second mapping was done using the program GSNAP (18) with SNP tolerant mapping option. A GSNAP SNP file was generated by home-made perl scripts using the SEX-DETECTOR SNP detail output file. Shortly, for each polymorphic position of all contigs, the most probable posterior SNP type was used to extract the possible alleles and write them to the GSNAP SNP file. This way, reference mapping bias was corrected for both sex-linked and autosomal contigs. Only uniquely mapped and concordant paired reads were kept after this. See Supplementary Table S1 for percentage of mapped reads. SEX-DETECTOR was run a second time on this new mapping and the new inferences were used afterwards for all analyses (see Supplementary Table S2 for inference results).

#### **5) Validation of sex-linked contigs**

##### **5.1) Detection of false X-hemizygous contigs**

Erroneous inference of X-hemizygous contig can be due to a true X/Y gene which X and Y copies were assembled into different contigs. In order to detect such cases, X-hemizygous contigs were blasted (19) with parameter `-e 1E-5` against RNA-seq contigs that have male-

limited expression (see section 7 below for how male-limited contigs were inferred). These cases were removed from the analyses presented here.

## 5.2) Validation using data from literature

A few sex-linked and autosomal genes in *S. latifolia* have already been described in the literature (see Supplementary Table S3).

## 5.3) Validation using a genetic map

A genetic map was built and contigs from the X linkage group were used to validate SEX-DETECTOR inferences. RNA-seq reads from the flower bud *S. latifolia* full-sib cross (hereafter CP) and backcross (hereafter BC1) were mapped against the reference transcriptome using BWA (13) with a maximum number of mismatch equal to 5. Libraries were merged and realigned using GATK (15) and SNPs were analysed using reads2snps (16). Using a customized perl script, SNP genotypes from the parents and the offspring as well as the associated posterior probabilities were extracted from the reads2snps output file. Only SNPs with a reads2snps posterior genotyping probability higher than 0.8 were kept for further analyses. Then, only informative SNPs were kept: both parents had to be homozygous and different between father LEUK144-3 and mother U10\_37 in a first generation backcross population design (BC1) and at least one allele had to be different between mother C1\_37 and father U10\_49 in the cross-pollinator (CP). Filtered SNPs were then converted into a JoinMap format using a customized R script. If more than one informative SNP per contig was present, the SNP was used with less segregation distortion and less missing values. This led to 8,023 BC1 and 16,243 CP markers. Loci with more than 10 % missing values were excluded, resulting in 7,951 BC1 and 15,118 CP markers. Linkage groups were identified using the default setting of JoinMap 4.1 (20). Robustness of the assignment of the linkage groups was tested using LepMap (21). Blasting the contigs against known sex-linked genes allowed the identification of the X chromosome linkage group. Contigs could not be ordered along the linkage groups due to the too limited number of individuals that prevented the convergence of contig order. However, contigs were reliably attributed to linkage groups.

## 5.4) Validation using isolated Y chromosome DNA-seq data

Filtered Y chromosome DNA-seq reads were filtered for quality and Illumina adapters were removed using the ea-utils FASTQ processing utilities (22). The optimal kmer value for assembly was searched using KmerGenie (23). Filtered reads were assembled using soapdenovo2 (24) with kmer=49, as suggested by KmerGenie. The obtained assembly was highly fragmented, therefore RNA-seq data was used to join, order and orient the genomic fragments with L\_RNA\_scaffolder (25). The following RNA-seq reads were used (see section 1): one sample of male flower buds sequenced by 454, 6 samples of male flower buds sequenced by Illumina paired-end, 4 samples of male leaves sequenced by Illumina paired-end and one sample of male pooled tissues sequenced by PacBio. The genomic assembly was successively scaffolded with L\_RNA\_scaffolder using RNA-seq samples one after the other, first 454 samples then Illumina and finally PacBio. The obtained contigs were filtered to be longer than 200pb.

## 5.5) Set of validated sex-linked and autosomal contigs

The three sources of data (literature, genetic map and filtered Y sequence data) were compared to SEX-DETECTOR inferred sex-linked RNA-seq contigs using BLAST (19) with parameter -e 1E-5. Blasts were filtered for having a percentage of identity over 90%, an alignment length over 100bp and were manually checked. If a sex-linked RNA-seq contig

blasted against a sequence from one of the three data sources (literature, X genetic map or filtered Y DNA-seq) it was then considered as validated. See Supplementary Table S2 for numbers of validated sex-linked contigs.

## **6) Expression level estimates**

### **6.1) whole contig expression levels**

Whole contig mean expression levels were obtained for each individual using GATK DepthOfCoverage (15) as the sum of every position coverage, divided by the length of the contig. Normalised expression levels, in RPKM (26), were then computed for each individual by dividing by the value by the library size of the individual (total number of mapped reads), accounting for different depths of coverage among individuals. Whole contig mean male and female expression levels were then computed by averaging male and female individuals for each contig.

### **6.2) Allelic expression levels**

In order to study separately X and Y allele expression levels in males and females, expression levels were studied at the SNP level. In *S. latifolia*, for each sex-linked contig expression levels were estimated using read counts from both X/Y and X-hemizygous informative SNPs. SNPs were attributed to an X/Y or X hemizygous segregation type if the according posterior probability was higher than 0.5. SNPs are considered informative if the father is heterozygous and has a genotype that is different from the mother (otherwise it is not possible to tell apart the X from the Y allele and therefore it is not possible to compute X and Y expression separately). X/Y SNPs for which at least one female had over two percent of her reads belonging to the Y allele were removed as unlikely to be true X/Y SNPs. Informative autosomal SNPs from autosomal contigs were used in a similar way.

Contigwise autosomal, X, Y, X+X and X+Y normalised expression levels in RPKM (26) were computed by summing read numbers for each X-linked or Y-linked alleles for all SNPs of the contig and each individual separately and then normalised using the library size and the number of studied sex-linked SNPs in the contig:

$$E = r / (n * l) \quad (1)$$

With E = normalised expression level for a given individual, r = sum of total read counts, n = number of studied SNPs, l = library size of the individual (number of mapped reads).

For contigs that only have X/X SNPs (SNPs for which the father's X is different to both Xs from the mother), Y expression level is only computed from the father as all males are homozygous in the progeny. Such contigs were therefore removed when having under 3 X/X SNPs to avoid approximations on the contig mean Y/X expression level (39 contigs removed in the flower buds dataset, 44 in the leaves dataset and 40 in the seedlings dataset).

In order to make *S. latifolia* expression levels comparable to *S. viscosa* and *S. vulgaris* for sex-linked contigs, *S. viscosa* and *S. vulgaris* expression levels were estimated using only the positions used in *S. latifolia* (informative X/Y or X-hemizygous SNPs). The read count of every position in every contig and for every *S. viscosa* and *S. vulgaris* individual was given by GATK DepthOfCoverage (15). Only positions corresponding to informative autosomal, X/Y or X-hemizygous SNPs in *S. latifolia* were used to compute the expression level for each contig and each individual as explained in equation (1).

Contigwise *S. latifolia* autosomal, X, Y, X+X, X+Y allelic expression levels were then averaged among individuals. Autosomal normalised expression levels in the two outgroups (*S. vulgaris* and *S. viscosa*) were averaged together.

### **7) Identification of contigs with sex-biased expression**

The analysis was done separately for the three tissues (flower buds, seedling and rosette leaves) as in Zemp et al. (7) using the R package edgeR (27). See Supplementary Table S2 for number of sex-biased contigs removed in order to study dosage compensation. Male-limited expressed contigs were identified by calculating the mean expression values (FPKM) in both sexes and selecting those which were exclusively expressed in males.

### **8) Analysis of expression divergence between *S. latifolia* and the two outgroups**

The normalised difference in allelic expression between *S. latifolia* and the two outgroups (hereafter  $\Delta$ ) was computed in order to study how sex chromosome expression levels evolved in *S. latifolia* compared to autosomal expression levels in the two outgroups:  $\Delta$  is equal to zero if *S. latifolia* and the outgroups have equal expression levels,  $\Delta$  is positive if *S. latifolia* has higher expression levels compared to the outgroups and  $\Delta$  is negative otherwise (2).

$$\Delta = (S. latifolia \text{ expression level} - \text{outgroup expression level}) / (\text{outgroup expression level}) \quad (2)$$

Sex-linked contigs were grouped by categories of degeneration level using the average Y over X expression ratio in males. 200 autosomal contigs were randomly selected in order to have similar statistical power among gene categories.  $\Delta$  values for each allele (maternal and paternal in males and females) and each gene category were compared to zero using a Wilcoxon test. P-values were corrected for multiple testing using a Benjamini and Hochberg correction. The estimated median  $\Delta$ , confidence intervals and adjusted p-values were then used to plot Figure 1 and Supplementary Figures S1 to S6.

For leaves and flower buds expression data of the two outgroups was averaged together as expression levels are highly correlated ( $R^2$  0.7 and 0.5 for flower buds and leaves respectively and p-value  $< 2.10^{-6}$  in both cases). Averaging expression levels between the two outgroups allows to get closer to the ancestral autosomal expression level.

### **9) Analysis of expression level difference between maternal and paternal alleles**

Maternal and paternal alleles expression were compared in *S. latifolia* for autosomal and sex-linked contigs. In order to deal with the difference in numbers of autosomal versus sex-linked contigs (Supplementary Table S2), 200 autosomal contigs were randomly selected in order to keep comparable powers of detection. Allelic expression levels in *S. latifolia* for each individual at every SNP position of each contig were analysed using a linear regression model with mixed effects (with the R package lme4, 28). We assumed a normal distribution of the read count data after log transformation. In order to account for inter-individual and inter-contig variability, a random “individual” and a random “contig” effect were included in the model. The aim of this modeling framework was to estimate the joint effect of the chromosomal origin of alleles (paternal or maternal in males or females) and the status of the gene (autosomal or sex-linked with various levels of Y degeneration defined by the average Y over X expression ratio in males). Two fixed effects with interaction were therefore considered in the model (3). In order to estimate the changes in sex-linked gene expression levels since the evolution of sex chromosomes, we used the average of the two outgroup expression levels as a reference (offset)

for every SNP position, divided by two in order to be comparable to *S. latifolia* allelic expression levels.

$$\log(\text{Expression}+1) \sim \text{Chromosome} * \text{Degeneration} + (1|\text{individual}) + (1|\text{Contig}), \text{offset} = \log(\text{outgroup average expression}/2 + 1) \quad (3)$$

All effects of the model (fixed or random) were proved highly significant (p-values <  $2.2 \cdot 10^{-16}$ ) using comparison of the fit of model (3) to simpler nested models (removing one effect at a time in model (3)). In order to statistically test whether there was a difference between the effects of paternal and maternal alleles in females in different degeneration categories we used the contrasts provided by the lmerTest package in R (28). This strategy provided estimates, confidence intervals and p-values of the difference between the two effects of paternal and maternal origin in females in interaction with degeneration levels, while normalising by the expression of the two outgroups. Moreover, the presence of random effects allows to account for inter-individual and inter-contig variability. Finally, p-values were corrected for multiple testing using a Benjamini and Hochberg correction (29). These values were used to plot Figure 2 and Supplementary Figures S7 to S12.

### **10) GO term analysis**

Gene Ontology was studied using the Blast2GO PRO version 2.7.2 (30) as in (7).

### **References**

1. R. Bergero, S. Qiu, D. Charlesworth, Gene Loss from a Plant Sex Chromosome System. *Curr. Biol. CB* (2015), doi:10.1016/j.cub.2015.03.015.
2. A. S. T. Papadopulos, M. Chester, K. Ridout, D. A. Filatov, Rapid Y degeneration and dosage compensation in plant sex chromosomes. *Proc. Natl. Acad. Sci. U. S. A.* **112**, 13021–13026 (2015).
3. M. V. Chibalina, D. A. Filatov, Plant Y chromosome degeneration is retarded by haploid purifying selection. *Curr. Biol. CB.* **21**, 1475–1479 (2011).
4. M. Toups, P. Veltsos, J. R. Pannell, Plant sex chromosomes: lost genes with little compensation. *Curr. Biol. CB.* **25**, R427-430 (2015).
5. A. Muyle, R. Shearn, G. A. Marais, The Evolution of Sex Chromosomes and Dosage Compensation in Plants. *Genome Biol. Evol.* **9**, 627–645 (2017).
6. E. Pessia, T. Makino, M. Bailly-Bechet, A. McLysaght, G. A. B. Marais, Mammalian X chromosome inactivation evolved as a dosage-compensation mechanism for dosage-sensitive genes on the X chromosome. *Proc. Natl. Acad. Sci. U. S. A.* **109**, 5346–5351 (2012).
7. N. Zemp *et al.*, Evolution of sex-biased gene expression in a dioecious plant. *Nat. Plants.* **2**, 16168 (2016).
8. R. Hobza, A. Widmer, Efficient molecular sexing in dioecious *Silene latifolia* and *S. dioica* and paternity analysis in F(1) hybrids. *Mol. Ecol. Resour.* **8**, 1274–1276 (2008).

9. N. Zemp, A. Minder, A. Widmer, Identification of internal reference genes for gene expression normalization between the two sexes in dioecious white Campion. *PLoS One*. **9**, e92893 (2014).
10. A. Muyle *et al.*, Rapid de novo evolution of X chromosome dosage compensation in *Silene latifolia*, a plant with young sex chromosomes. *PLoS Biol*. **10**, e1001308 (2012).
11. J. Vrána, H. Simková, M. Kubaláková, J. Cíhalíková, J. Doležel, Flow cytometric chromosome sorting in plants: the next generation. *Methods San Diego Calif*. **57**, 331–337 (2012).
12. A. Muyle *et al.*, SEX-DETECTOR: A Probabilistic Approach to Study Sex Chromosomes in Non-Model Organisms. *Genome Biol. Evol.* **8**, 2530–2543 (2016).
13. H. Li, R. Durbin, Fast and accurate short read alignment with Burrows-Wheeler transform. *Bioinforma. Oxf. Engl.* **25**, 1754–1760 (2009).
14. H. Li *et al.*, The Sequence Alignment/Map format and SAMtools. *Bioinforma. Oxf. Engl.* **25**, 2078–2079 (2009).
15. M. A. DePristo *et al.*, A framework for variation discovery and genotyping using next-generation DNA sequencing data. *Nat. Genet.* **43**, 491–498 (2011).
16. G. Tsagkogeorga, V. Cahais, N. Galtier, The population genomics of a fast evolver: high levels of diversity, functional constraint, and molecular adaptation in the tunicate *Ciona intestinalis*. *Genome Biol. Evol.* **4**, 740–749 (2012).
17. P. Gayral *et al.*, Reference-free population genomics from next-generation transcriptome data and the vertebrate-invertebrate gap. *PLoS Genet.* **9**, e1003457 (2013).
18. T. D. Wu, S. Nacu, Fast and SNP-tolerant detection of complex variants and splicing in short reads. *Bioinforma. Oxf. Engl.* **26**, 873–881 (2010).
19. S. F. Altschul, W. Gish, W. Miller, E. W. Myers, D. J. Lipman, Basic local alignment search tool. *J. Mol. Biol.* **215**, 403–410 (1990).
20. J. W. VAN Ooijen, Multipoint maximum likelihood mapping in a full-sib family of an outbreeding species. *Genet. Res.* **93**, 343–349 (2011).
21. P. Rastas, L. Paulin, I. Hanski, R. Lehtonen, P. Auvinen, Lep-MAP: fast and accurate linkage map construction for large SNP datasets. *Bioinforma. Oxf. Engl.* **29**, 3128–3134 (2013).
22. E. Aronesty, *ea-utils*: “Command-line tools for processing biological sequencing data” (2011; <http://code.google.com/p/ea-utils>).
23. R. Chikhi, P. Medvedev, Informed and automated k-mer size selection for genome assembly. *Bioinforma. Oxf. Engl.* **30**, 31–37 (2014).



24. R. Luo *et al.*, SOAPdenovo2: an empirically improved memory-efficient short-read de novo assembler. *GigaScience*. **1**, 18 (2012).
25. W. Xue *et al.*, L\_RNA\_scaffolder: scaffolding genomes with transcripts. *BMC Genomics*. **14**, 604 (2013).
26. A. Oshlack, M. D. Robinson, M. D. Young, From RNA-seq reads to differential expression results. *Genome Biol.* **11**, 220 (2010).
27. M. D. Robinson, D. J. McCarthy, G. K. Smyth, edgeR: a Bioconductor package for differential expression analysis of digital gene expression data. *Bioinforma. Oxf. Engl.* **26**, 139–140 (2010).
28. R Development Core Team, R: A language and environment for statistical computing, reference index version 2.15.0. *R Found. Stat. Comput. Vienna Austria* (2012).
29. Y. Benjamini, Y. Hochberg, Controlling the False Discovery Rate: A Practical and Powerful Approach to Multiple Testing. *J. R. Stat. Soc. Ser. B Methodol.* **57**, 289–300 (1995).
30. A. Conesa *et al.*, Blast2GO: a universal tool for annotation, visualization and analysis in functional genomics research. *Bioinforma. Oxf. Engl.* **21**, 3674–3676 (2005).
31. A. Rautenberg, L. Hathaway, B. Oxelman, H. C. Prentice, Geographic and phylogenetic patterns in *Silene* section *Melandrium* (Caryophyllaceae) as inferred from chloroplast and nuclear DNA sequences. *Mol. Phylogenet. Evol.* **57**, 978–991 (2010).
32. C. Jenkins, S. R. Keller, A phylogenetic comparative study of preadaptation for invasiveness in the genus *Silene* (Caryophyllaceae). *Biol. Invasions*. **13**, 1471–1486 (2010).
33. A. Rautenberg, D. B. Sloan, V. Aldén, B. Oxelman, Phylogenetic Relationships of *Silene multinervia* and *Silene* Section *Conoimorpha* (Caryophyllaceae). *Syst. Bot.* **37**, 226–237 (2012).
34. J. Siroky, M. R. Castiglione, B. Vyskot, DNA methylation patterns of *Melandrium album* chromosomes. *Chromosome Res. Int. J. Mol. Supramol. Evol. Asp. Chromosome Biol.* **6**, 441–446 (1998).

## Supplementary Figures

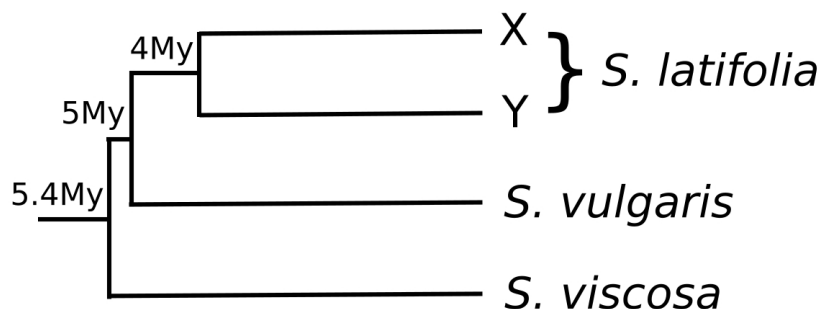

**Supplementary Figure S1:** Relatedness among the three studied species, extracted from (31) ages at the nodes are shown in million years (My). The exact relationship among species is poorly resolved (31–33). In some phylogenies *S. viscosa* is closest to *S. latifolia*, whereas in others *S. vulgaris* is closest as shown here, and in others both species are equally diverged to *S. latifolia*.

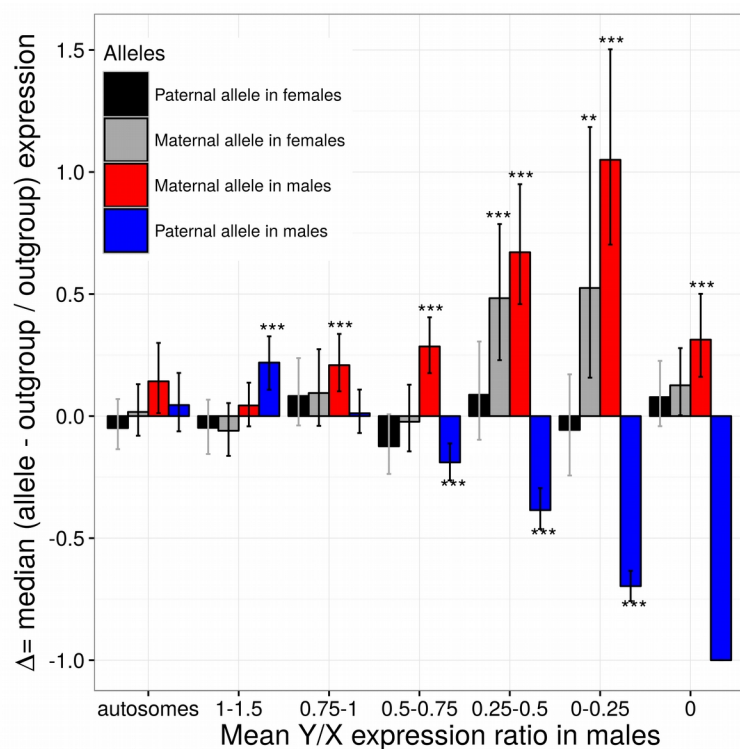

**Supplementary Figure S2:** Normalised difference in allelic expression levels between *S. latifolia* and the two outgroups without sex chromosomes *S. vulgaris* and *S. viscosa* (hereafter  $\Delta$ ), in autosomal and sex-linked contigs for the **seedling** tissue. Maternal and paternal allelic read

numbers were summed at SNP positions and normalised for each individual separately, then averaged among individuals for each contig.  $\Delta$  was computed as follows:  $\Delta = (\text{allelic expression in } S. \textit{latifolia} - \text{allelic expression in the outgroup}) / \text{allelic expression in the outgroup}$ . If  $\Delta$  is lower, higher or equal to zero, then expression in *S. latifolia* is respectively lower, higher or equal to the outgroup. For all contig categories,  $\Delta$  was compared to zero using a Wilcoxon test. The median  $\Delta$ , confidence intervals and p-values adjusted for multiple testing using a Benjamini and Hochberg correction are shown (\*\*\*: p-value < 0.001; \*\*: p-value < 0.01, \*: p-value < 0.05). The Y/X ratio was computed in *S. latifolia* males and averaged among individuals to use as a proxy for Y degeneration. X-hemizygous contigs have a Y/X ratio equal to zero. Contigs with sex-biased expression were removed, as well as contigs with Y/X expression ratios above 1.5. Sample sizes for the different contig categories are: autosomal:200; 1-1.5:148; 0.75-1:139; 0.5-0.75:160; 0.25-0.5:114; 0-0.25:79; 0:205 (note that 200 autosomal contigs were randomly selected in order to have similar statistical power among gene categories). In the absence of dosage compensation, the single X in males should be expressed at levels similar to the outgroup that does not have sex chromosomes, in other words, without dosage compensation  $\Delta$  should be close to zero for the maternal allele in males (red bars). Results show that the maternal allele is hyper-expressed in *S. latifolia* when the Y chromosome is degenerated, both in males and females.

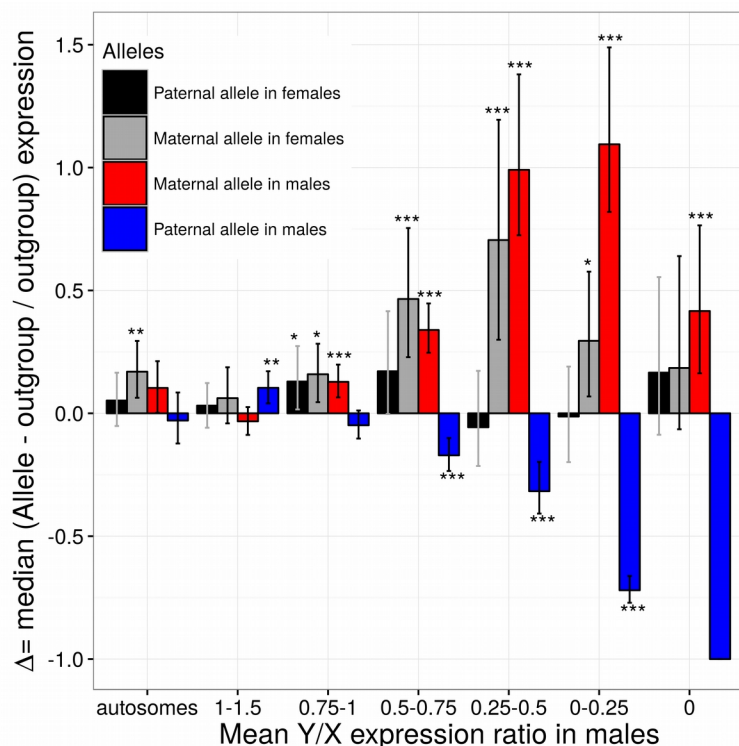

**Supplementary Figure S3:** Normalised difference in allelic expression levels between *S. latifolia* and the two outgroups without sex chromosomes *S. vulgaris* and *S. viscosa* ( $\Delta$ ), in

autosomal and sex-linked contigs for the **flower bud** tissue. Same legend as Supplementary Figure S2 except for sample sizes for the different contig categories: autosomal:200; 1-1.5:95; 0.75-1:195; 0.5-0.75:203; 0.25-0.5:176; 0-0.25:116; 0:103.

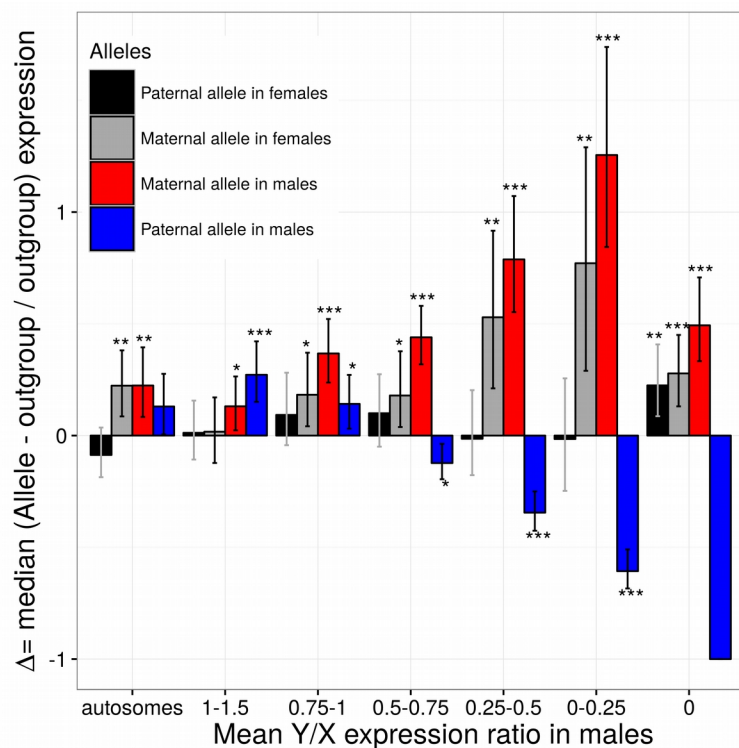

**Supplementary Figure S4:** Normalised difference in allelic expression levels between *S. latifolia* and the two outgroups without sex chromosomes *S. vulgaris* and *S. viscosa* ( $\Delta$ ), in autosomal and sex-linked contigs for the **leaf** tissue. Same legend as Supplementary Figure S2 except for sample sizes for the different contig categories: autosomal:200; 1-1.5:159; 0.75-1:132; 0.5-0.75:147; 0.25-0.5:126; 0-0.25:71; 0:275.

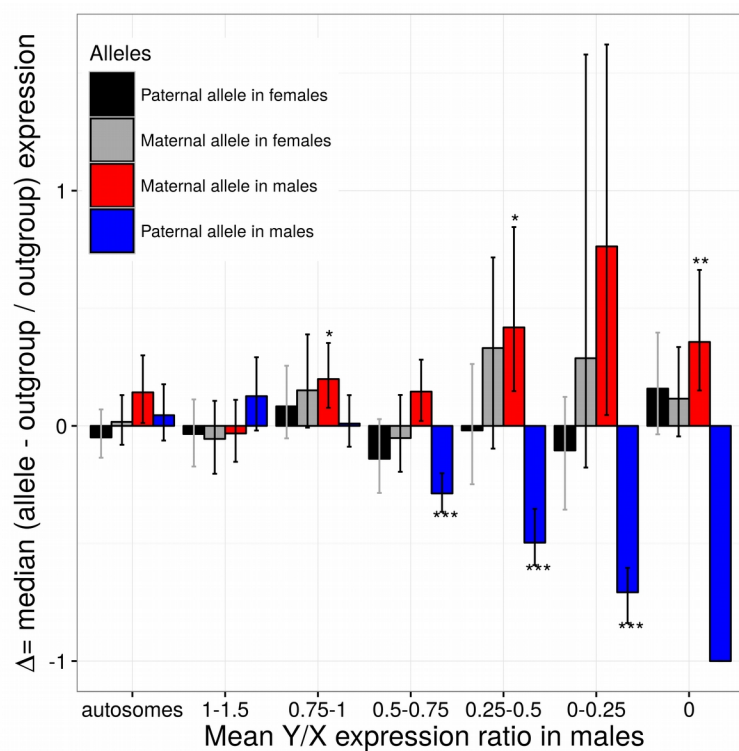

**Supplementary Figure S5:** Normalised difference in allelic expression levels between *S. latifolia* and the two outgroups without sex chromosomes *S. vulgaris* and *S. viscosa* ( $\Delta$ ), in autosomal and sex-linked contigs that were **validated** (see Materials and Methods), for the **seedling** tissue. Same legend as Supplementary Figure S2 except for sample sizes for the different contig categories: autosomal:77; 1-1.5:71; 0.75-1:82; 0.5-0.75:91; 0.25-0.5:44; 0-0.25:29; 0:89.

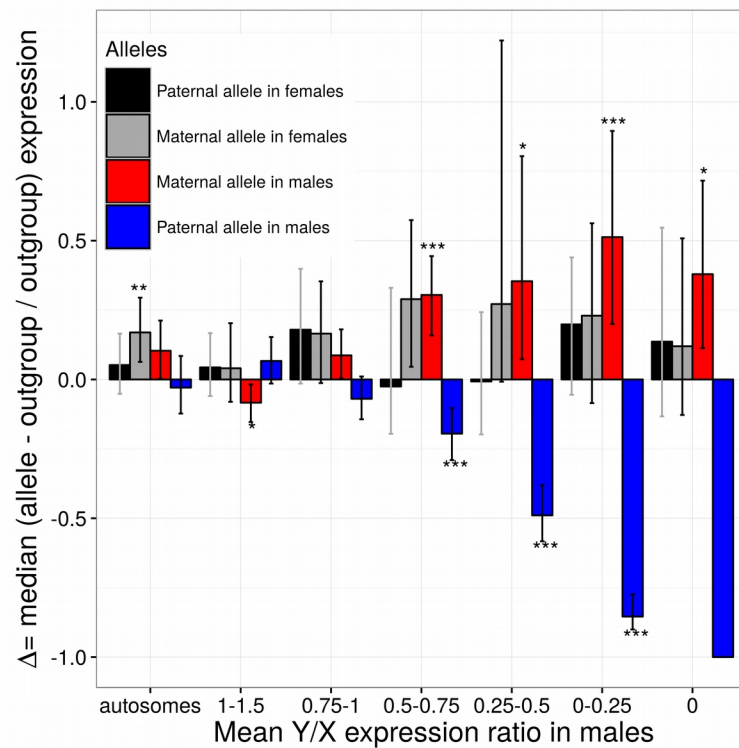

**Supplementary Figure S6:** Normalised difference in allelic expression levels between *S. latifolia* and the two outgroups without sex chromosomes *S. vulgaris* and *S. viscosa* ( $\Delta$ ), in autosomal and sex-linked contigs that were **validated** (see Materials and Methods), for the **flower bud** tissue. Same legend as Supplementary Figure S2 except for sample sizes for the different contig categories: autosomal:74; 1-1.5:86; 0.75-1:91; 0.5-0.75:67; 0.25-0.5:45; 0-0.25:31; 0:55.

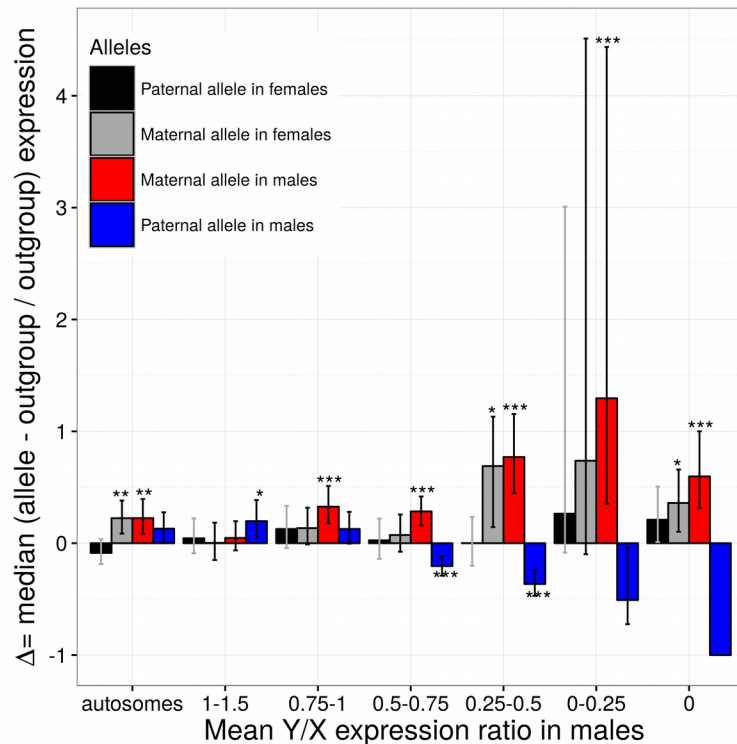

**Supplementary Figure S7:** Normalised difference in allelic expression levels between *S. latifolia* and the two outgroups without sex chromosomes *S. vulgaris* and *S. viscosa* ( $\Delta$ ), in autosomal and sex-linked contigs that were **validated** (see Materials and Methods), for the **leaf** tissue. Same legend as Supplementary Figure S2 except for sample sizes for the different contig categories: autosomal:79; 1-1.5:84; 0.75-1:74; 0.5-0.75:77; 0.25-0.5:52; 0-0.25:19; 0:119.

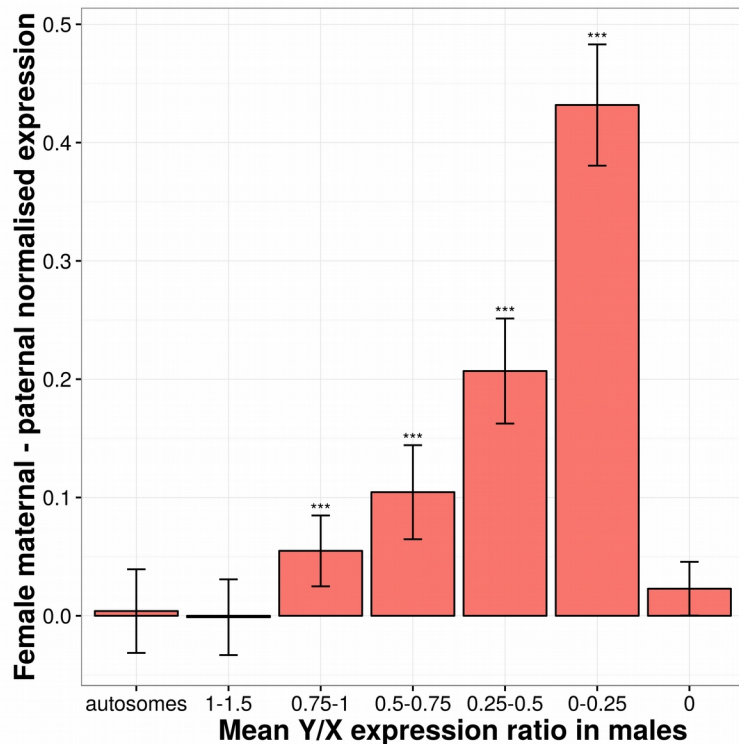

**Supplementary Figure S8:** Normalised expression difference between the maternal and paternal allele in *S. latifolia* females in autosomal and sex-linked contigs for the **seedling** tissue. The Y axis unit is the normalised allelic read count difference in log scale. A linear regression model with mixed effects was used to study allelic expression in *S. latifolia* for every SNP position. In order to measure the changes in *S. latifolia* expression due to sex chromosomes evolution, the outgroup *S. vulgaris* that does not have sex chromosomes was used as a reference in the model (see Materials and Methods for details). The framework provided estimates for the normalised difference between the effect of paternal and maternal origin of alleles in interaction with the contig status (autosomal or sex-linked with various levels of Y degeneration), while accounting for inter-contig and inter-individual variability. See Supplementary Figure S2 legend for sample sizes for the different contig categories and statistical significance symbols. Results show that Y degeneration is linked to a significant expression difference between the paternal and maternal alleles in females, which is not observed in autosomal and non-degenerated sex-linked contigs.



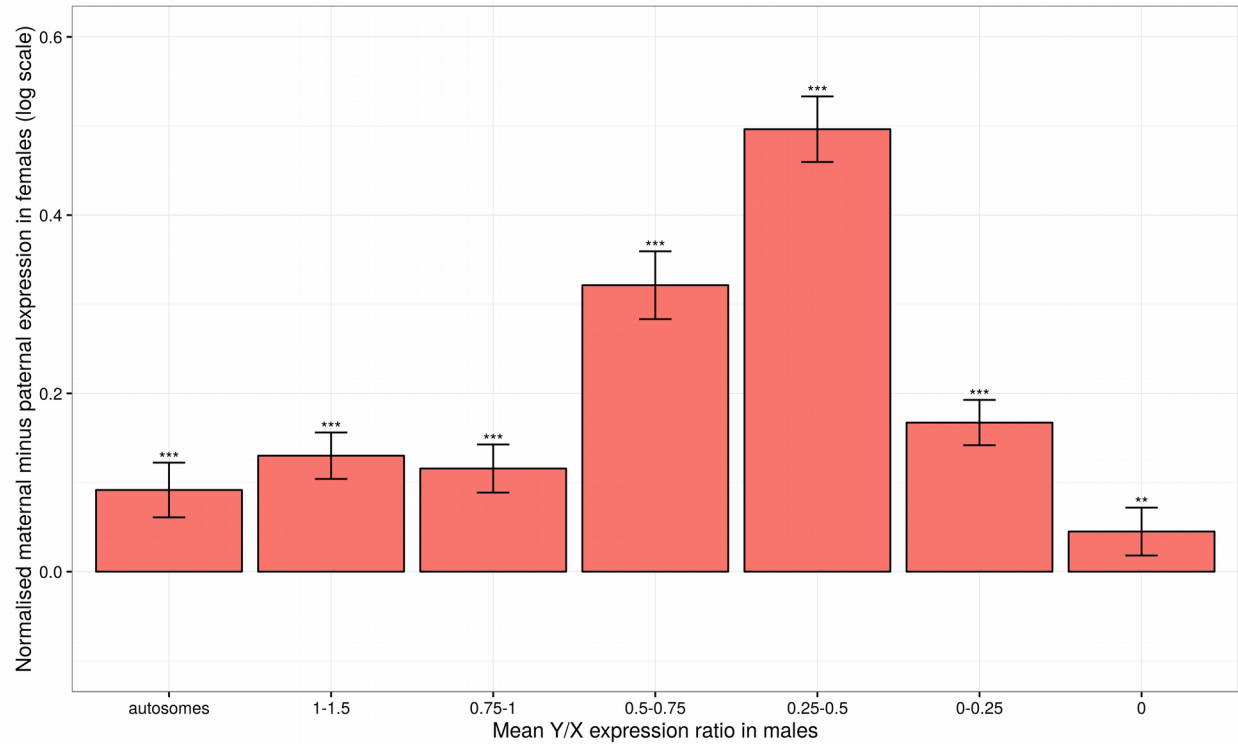

**Supplementary Figure S9:** Normalised expression difference between the maternal and paternal allele in *S. latifolia* females in autosomal and sex-linked contigs for the **flower bud** tissue. See supplementary Figure S8 for legend and Supplementary Figure S3 for sample sizes for the different contig categories.



**Supplementary Figure S10:** Normalised expression difference between the maternal and paternal allele in *S. latifolia* females in autosomal and sex-linked contigs for the **leaf** tissue. See supplementary Figure S8 for legend and Supplementary Figure S4 for sample sizes for the different contig categories.

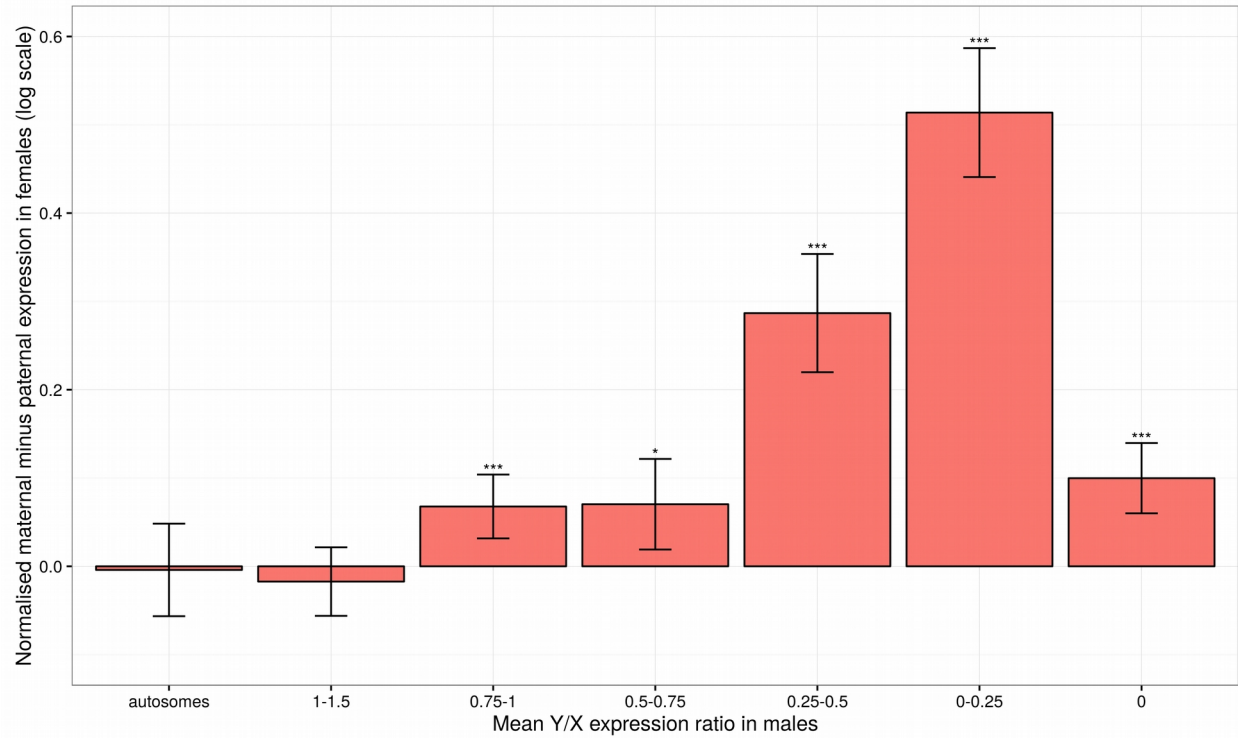

**Supplementary Figure S11:** Normalised expression difference between the maternal and paternal allele in *S. latifolia* females in autosomal and sex-linked **validated** contigs for the **seedling** tissue. See supplementary Figure S8 for legend and Supplementary Figure S5 for sample sizes for the different contig categories.

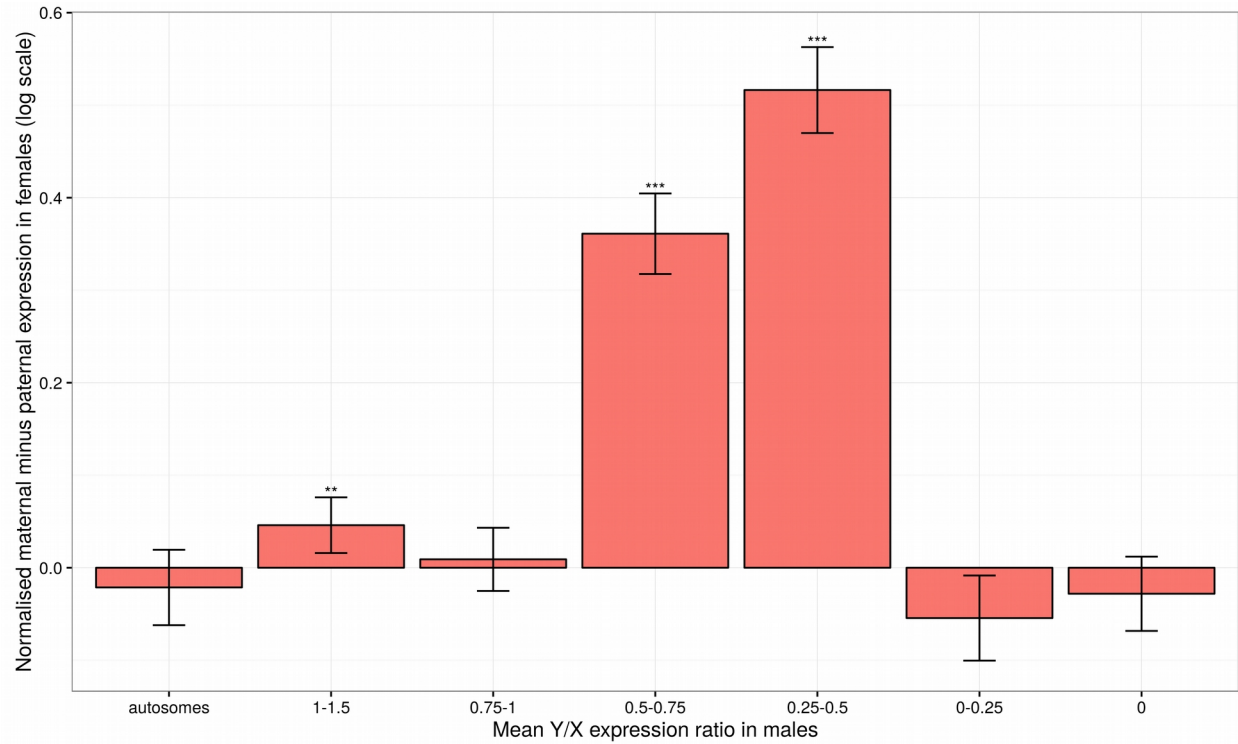

**Supplementary Figure S12:** Normalised expression difference between the maternal and paternal allele in *S. latifolia* females in autosomal and sex-linked **validated** contigs for the **flower bud** tissue. See supplementary Figure S8 for legend and Supplementary Figure S6 for sample sizes for the different contig categories.

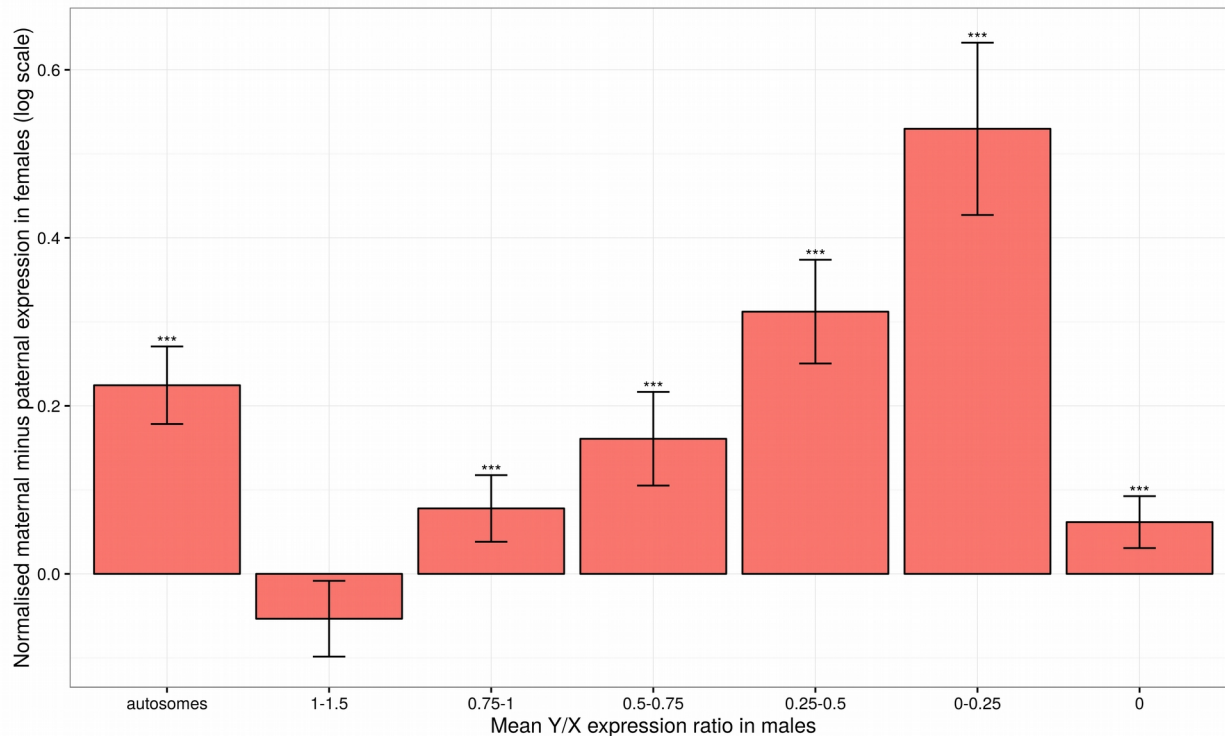

**Supplementary Figure S13:** Normalised expression difference between the maternal and paternal allele in *S. latifolia* females in autosomal and sex-linked **validated** contigs for the **leaf** tissue. See supplementary Figure S8 for legend and Supplementary Figure S7 for sample sizes for the different contig categories.

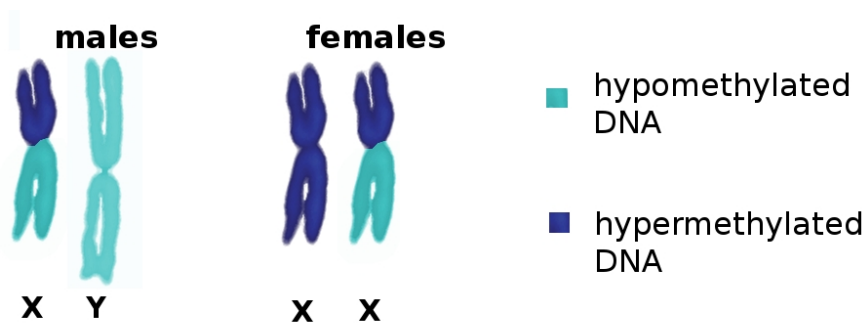

**Supplementary Figure S14:** Illustration of DNA methylation staining results in *S. latifolia* (34). One arm of one of the two X chromosomes in females was shown to be hypomethylated, as well as the same arm of the single X in males. Based on our results, we hypothesize that the hypomethylated X chromosome corresponds to the maternal, upregulated X. Unfortunately, parental origin of the X chromosomes was unknown in this study.

## Supplementary Tables

**Supplementary Table S1:** library sizes (number of reads) of each individual and mapping statistics.

**Supplementary Table S2:** Number of contigs after SEX-DETECTOR inferences, removal of sex-bias and selection of validated contigs in the three tissues.

|                                              | Tissue type |        |           |
|----------------------------------------------|-------------|--------|-----------|
|                                              | flower buds | leaves | seedlings |
| <b>number of ORFs</b>                        | 46178       |        |           |
| <b>Unassigned</b>                            | 33172       | 33564  | 33781     |
| <b>Autosomal</b>                             | 11662       | 11558  | 11292     |
| <b>X/Y</b>                                   | 1140        | 772    | 844       |
| <b>X-hemizygous</b>                          | 204         | 284    | 261       |
| <b>X/Y non sex-biased</b>                    | 901         | 733    | 732       |
| <b>X-hemizygous non sex-biased</b>           | 103         | 275    | 205       |
| <b>X/Y non sex-biased validated</b>          | 339         | 345    | 365       |
| <b>X-hemizygous non sex-biased validated</b> | 55          | 119    | 89        |
| <b>Autosomal validated</b>                   | 74          | 79     | 77        |

**Supplementary Table S3:** list of known sex-linked genes in *S. latifolia* and associated literature references.

## Author contributions

Aline Muyle, Niklaus Zemp, Alex Widmer and Gabriel Marais conceived the study and experimental design. Niklaus Zemp and Alex Widmer prepared and sequenced the plant material. Aline Muyle ran SEX-DETECTOR on the RNA-seq datasets for the three tissues, analysed the data, prepared Tables and Figures and wrote the Supplementary Material with inputs from other authors. Niklaus Zemp generated the X chromosome genetic map (with help from Aline Muyle for the mapping and genotyping part). Radim Cegan, Jan Vrana and Roman Hobza did the Y chromosome flow cytometry sorting and sequencing. Clothilde Deschamps did the first assembly of the sorted Y chromosome and improved it with RNA-seq data with the help of Cecile Fruchard. Aline Muyle did the blasts to validate the inferences of SEX-DETECTOR. Raquel Tavares did the GO term analysis. Aline Muyle and Frank Picard did the statistical analyses of the data. Gabriel Marais and Aline Muyle wrote the main text of the manuscript with inputs from other authors.
